# Supplementary material for: Urinary exosomal microRNA profiling in type 2 diabetes patients taking dipeptidyl peptidase-4 inhibitor compared with sulfonylurea
Source: PubMed Central journal article supplement — Kidney Res Clin Pract. 2021 Jul 7;40(3):383–91. doi: 10.23876/j.krcp.21.015 (PMC8476296; doi:10.23876/j.krcp.21.015), 2021-07-07
Supplement: j-krcp-21-015suppl1.pdf [file j-krcp-21-015suppl1.pdf]

**Supplementary Table 1.** Baseline characteristics of the subjects included in NanoString<sup>a</sup> analyses

|                                    | Nondiabetic control<br>(n = 4) | Type 2 DM                  |                         | p-value |
|------------------------------------|--------------------------------|----------------------------|-------------------------|---------|
|                                    |                                | DPP-4 inhibitor<br>(n = 4) | Sulfonylurea<br>(n = 4) |         |
| No. of patients                    | 4                              | 4                          | 4                       |         |
| Age (yr)                           | 48.5 ± 11.9                    | 60.3 ± 7.5                 | 57.3 ± 3.1              | 0.488   |
| Male sex                           | 1 (25.0)                       | 1 (25.0)                   | 2 (50.0)                | 1       |
| Height (cm)                        | 163.5 ± 7.0                    | 161.9 ± 8.2                | 159.8 ± 11.5            | 0.774   |
| Weight (kg)                        | 58.5 ± 7.7                     | 71.6 ± 12.3                | 66.1 ± 16.2             | 0.604   |
| BMI (kg/m <sup>2</sup> )           | 21.8 ± 1.7                     | 27.2 ± 2.5                 | 25.5 ± 2.3              | 0.374   |
| WBC (×10 <sup>3</sup> /μL)         | 5.73 ± 1.52                    | 7.04 ± 0.29                | 6.84 ± 3.15             | 0.907   |
| Hemoglobin (g/dL)                  | 12.9 ± 2.2                     | 13.6 ± 1.2                 | 13.6 ± 0.8              | 0.972   |
| Total protein (g/dL)               | 7.20 ± 0.24                    | 7.38 ± 0.43                | 7.40 ± 0.54             | 0.945   |
| Albumin (g/dL)                     | 4.53 ± 0.10                    | 4.50 ± 0.29                | 4.65 ± 0.17             | 0.414   |
| Glucose (mg/dL)                    | 99.8 ± 3.9                     | 152.3 ± 42.2               | 148.5 ± 12.9            | 0.871   |
| AST (IU/L)                         | 18.5 (15.3–21.8)               | 22.0 (21.3–24.5)           | 32.0 (23.5–43.5)        | 0.205   |
| ALT (IU/L)                         | 16.5 (10.8–25.3)               | 25.5 (23.3–27.5)           | 40.0 (26.0–59.0)        | 0.268   |
| Urea nitrogen (mg/dL)              | 12.3 ± 2.3                     | 13.3 ± 2.1                 | 14.6 ± 4.6              | 0.612   |
| Creatinine (mg/dL)                 | 0.80 ± 0.15                    | 0.70 ± 0.08                | 0.80 ± 0.19             | 0.536   |
| HbA1c (%)                          | NA                             | 7.10 ± 1.15                | 6.85 ± 0.54             | 0.707   |
| eGFR (mL/min/1.73 m <sup>2</sup> ) | 95.3 ± 11.7                    | 95.5 ± 6.6                 | 91.7 ± 12.9             | 0.622   |
| Total cholesterol (mg/dL)          | 198.8 ± 17.6                   | 151.5 ± 37.8               | 166.0 ± 24.6            | 0.544   |
| HDL cholesterol (mg/dL)            | 66.8 ± 11.3                    | 54.8 ± 14.4                | 49.5 ± 11.4             | 0.588   |
| LDL cholesterol (mg/dL)            | 131.8 ± 18.5                   | 87.8 ± 43.7                | 99.3 ± 20.7             | 0.651   |
| Triglycerides (mg/dL)              | 75.5 (69.0–80.5)               | 105.5 (88.5–125.0)         | 226.5 (167.5–268.8)     | 0.023   |
| UACR (mg/gCr)                      | NA                             | 10.65 ± 7.38               | 4.87 ± 3.03             | 0.221   |

Data are presented as number only, mean ± standard deviation, count (%), or median (interquartile range), as appropriate.

Patients with type 2 DM were categorized by their antidiabetic medication.

ALT, alanine aminotransferase; AST, aspartate aminotransferase; BMI, body mass index; DM, diabetes mellitus; DPP-4, dipeptidyl peptidase-4; eGFR, estimated glomerular filtration rate; HbA1c, glycated hemoglobin; HDL, high-density lipoprotein; LDL, high-density lipoprotein; NA, not available; UACR, urine albumin-to-creatinine ratio; WBC, white blood cell.

<sup>a</sup>NanoString Technologies, Seattle, WA, USA.
