# Supplementary material for: Urinary exosomal microRNA profiling in type 2 diabetes patients taking dipeptidyl peptidase-4 inhibitor compared with sulfonylurea
Source: PubMed Central journal article supplement — Kidney Res Clin Pract. 2021 Jul 7;40(3):383–91. doi: 10.23876/j.krcp.21.015 (PMC8476296; doi:10.23876/j.krcp.21.015), 2021-07-07
Supplement: j-krcp-21-015suppl2.pdf [file j-krcp-21-015suppl2.pdf]

**Supplementary Table 2.** Correlation between urinary exosomal miRNA expression and kidney function and albuminuria

| MiRNA      | eGFR   |         | UACR   |         |
|------------|--------|---------|--------|---------|
|            | R      | p-value | R      | p-value |
| let-7c-5p  | 0.088  | 0.548   | 0.112  | 0.488   |
| miR-23a-3p | -0.073 | 0.595   | 0.073  | 0.631   |
| miR-26a-3p | -0.016 | 0.902   | 0.019  | 0.896   |
| miR-30d    | 0.083  | 0.551   | -0.027 | 0.859   |
| miR-205    | -0.039 | 0.777   | -0.092 | 0.539   |
| miR-200a   | -0.266 | 0.068   | -0.164 | 0.305   |

Correlation coefficients (R) and p-values were calculated by Pearson correlation analysis.

eGFR, estimated glomerular filtration rate; miRNA, microRNA; UACR, urine albumin-to-creatinine ratio.
