# Supplementary material for: Urinary exosomal microRNA profiling in type 2 diabetes patients taking dipeptidyl peptidase-4 inhibitor compared with sulfonylurea
Source: PubMed Central journal article supplement — Kidney Res Clin Pract. 2021 Jul 7;40(3):383–91. doi: 10.23876/j.krcp.21.015 (PMC8476296; doi:10.23876/j.krcp.21.015), 2021-07-07
Supplement: j-krcp-21-015suppl5.pdf [file j-krcp-21-015suppl5.pdf]

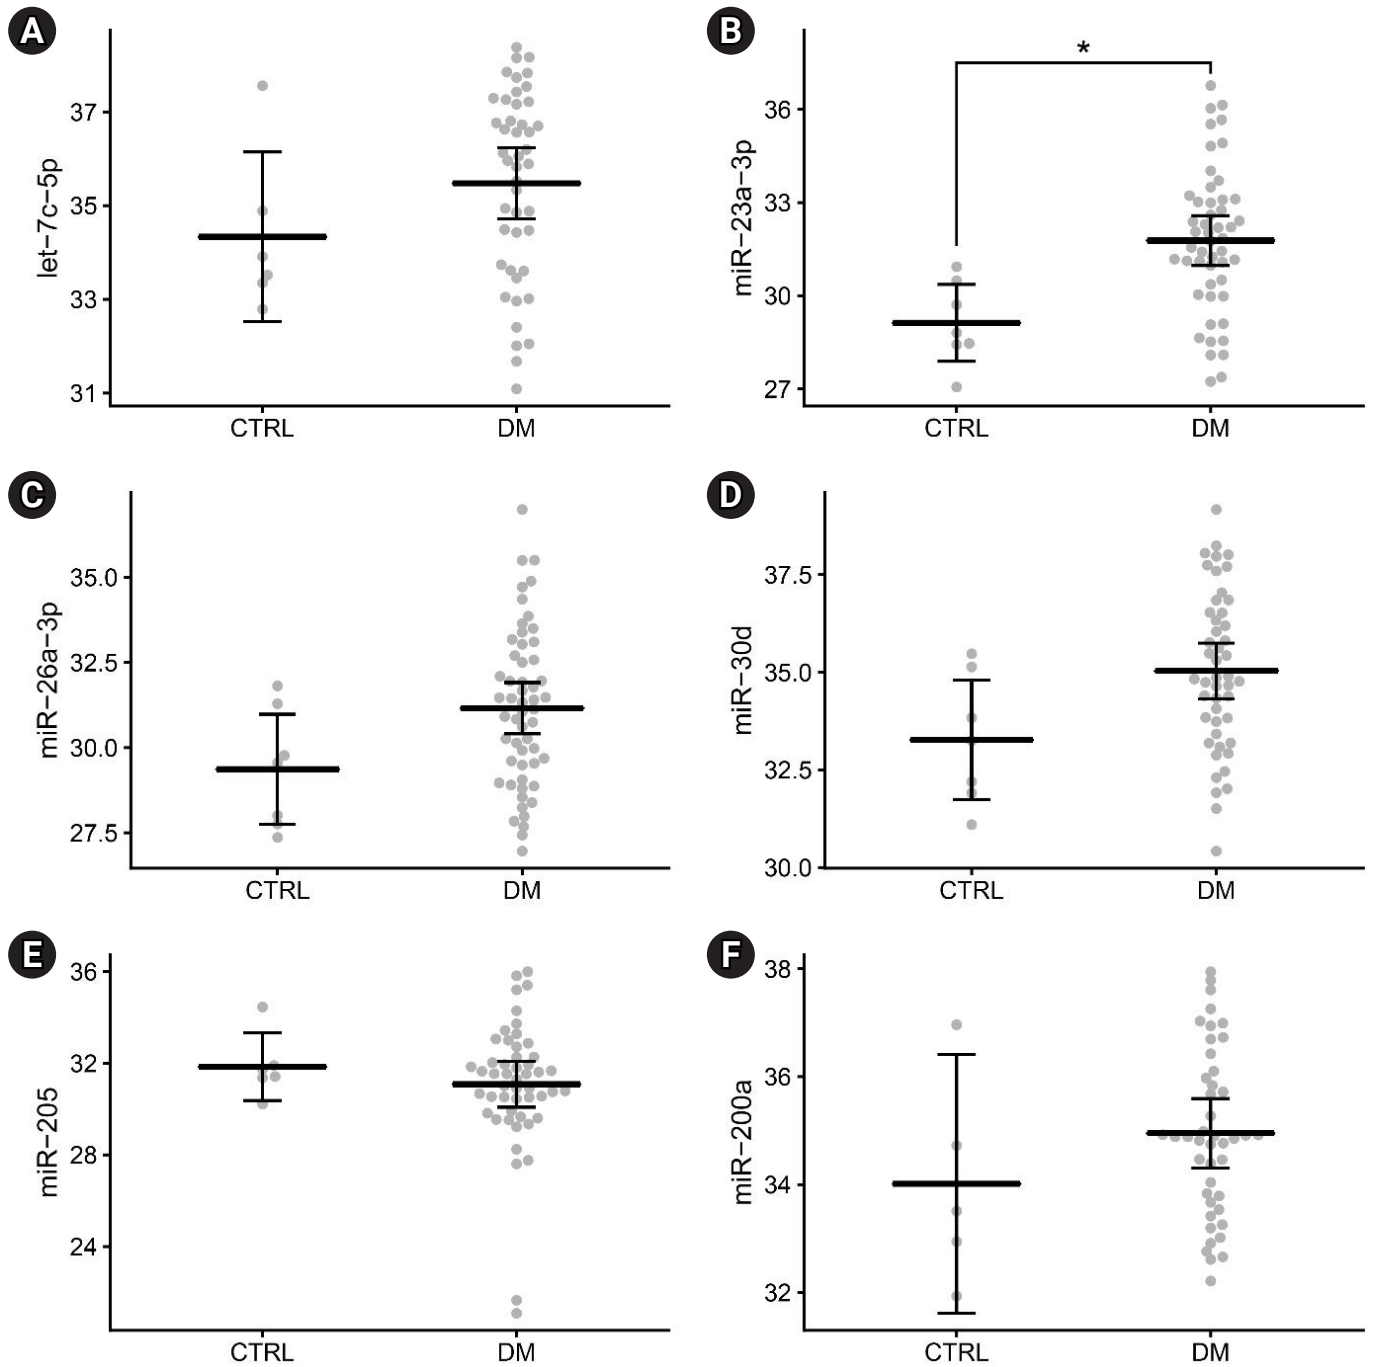

**Supplementary Figure 3. Expression of candidate urinary exosomal microRNAs (miRNAs) between the control (CTRL) group and the diabetes mellitus (DM) group.** The comparative threshold values of quantitative real-time polymerase chain reaction of urinary exosomal miRNAs including let-7c-5p (A), miR-23a-3p (B), miR-26a-3p (C), miR-30d (D), miR-205 (E), and miR-200a (F) are presented as arithmetic means and 95% confidence intervals in an error bar plot.

\*p < 0.01.
